# Supplementary material
Source: PubMed Central journal article supplement (PMC3791047)
Supplement: Supp_Figure4.pdf [file Supp_Figure4.pdf]

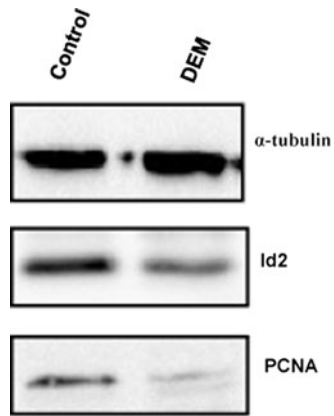

**SUPPLEMENTARY FIG. S4. Effects of GSH depletion by DEM in cell proliferation related proteins (PCNA and Id2).** Western blot analysis showing the protein levels of PCNA and Id2. Equal loading was evaluated using  $\alpha$ -tubulin. DEM, diethyl maleate; PCNA, proliferating cell nuclear antigen.
